# Supplementary material for: Tracing the migration and transformation of metabolites in xylem during wood growth by mass spectrometry imaging
Source: Royal Society of Chemistry journal article supplement (doi:10.1039/d1an02251b), 2022-01-01
Supplement: d1an02251b1.pdf [file d1an02251b1.pdf]

## **Tracing the migration and transformation of metabolites in xylem during wood growth by mass spectrometry imaging**

Wenya Hu<sup>†, a</sup>, Honggang Nie<sup>†, b</sup>, Yinghao Wang<sup>a</sup>, Na Li<sup>b</sup>, Shuangshuang Di<sup>b</sup>, Qiong Pan<sup>a</sup>, Jikun Liu<sup>a</sup>, Yehua Han<sup>\*, a</sup>

- a. State Key Laboratory of Heavy Oil Processing, China University of Petroleum-Beijing 102249, P. R. China.
- b. Beijing National Laboratory for Molecular Sciences, College of Chemistry and Molecular Engineering, Peking University, Beijing 100871, China

***Supporting Information***

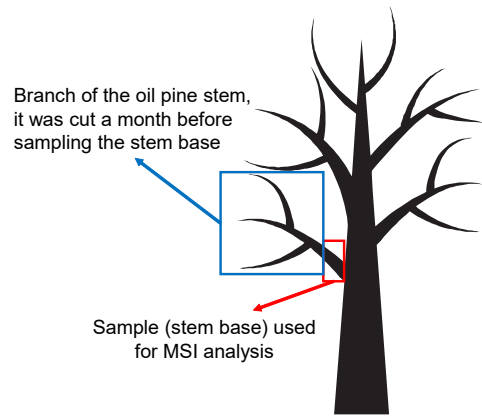

Fig. S1 Schematic diagram of sampling plan

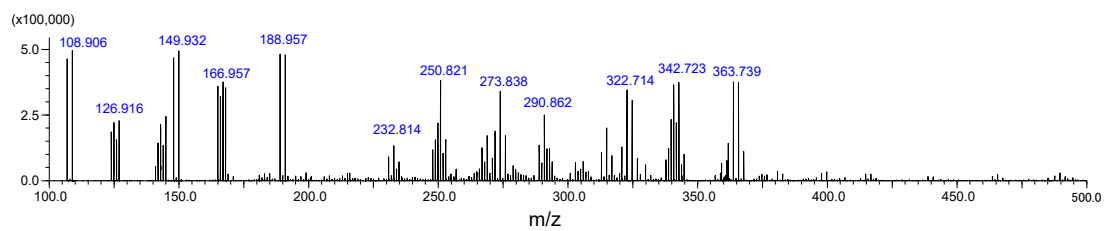

Fig. S2 Mass spectrum of AgNO<sub>3</sub> solution in methanol

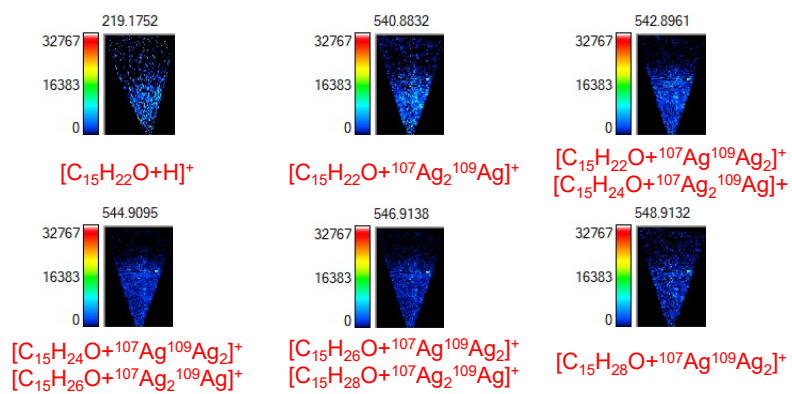

Fig. S3 Representative analyte ions images and their assigned molecular formulae using  $\text{AgNO}_3$  as the matrix

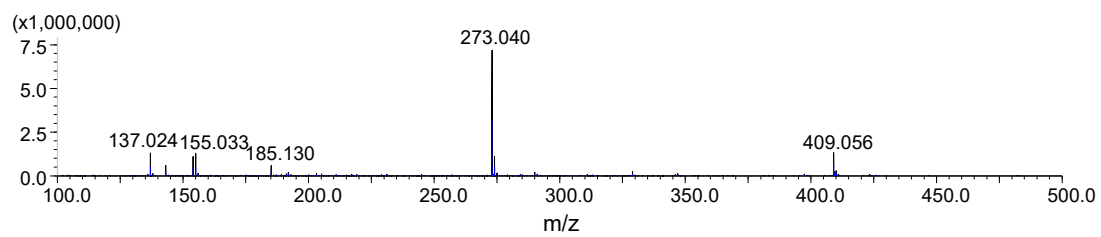

Fig. S4 MALDI MS spectrum of DHB blank in  $m/z$  100-500

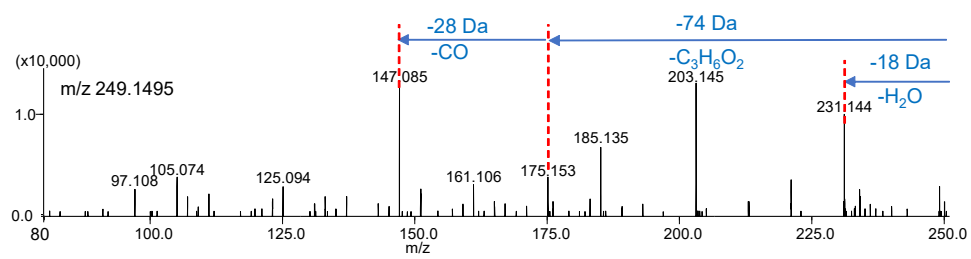

Fig. S5 MS/MS spectrum of m/z 249.1495

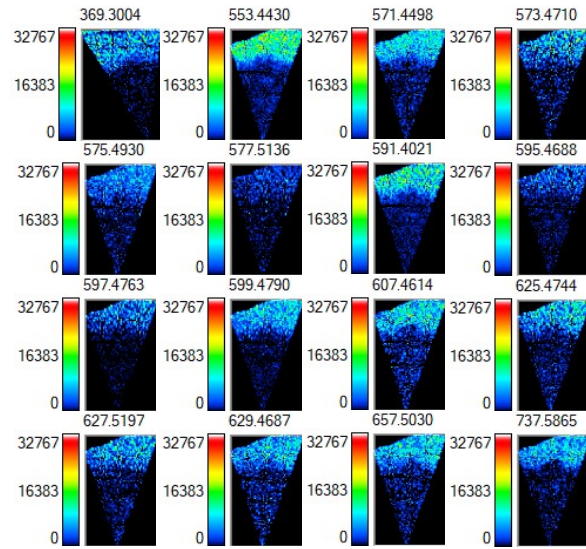

Fig. S6 Ion images of sapwood compounds in cedar

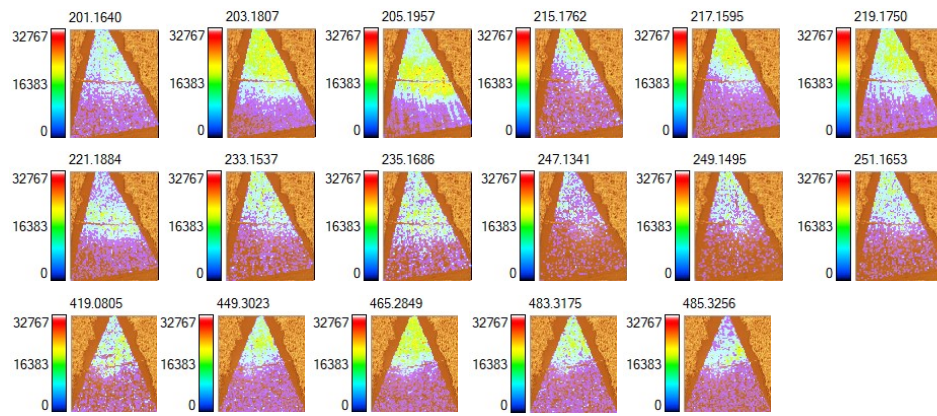

Fig. S7 Ion images of the heartwood compounds in cedar (the sample slice was taken from the same section as used in Fig. 3).



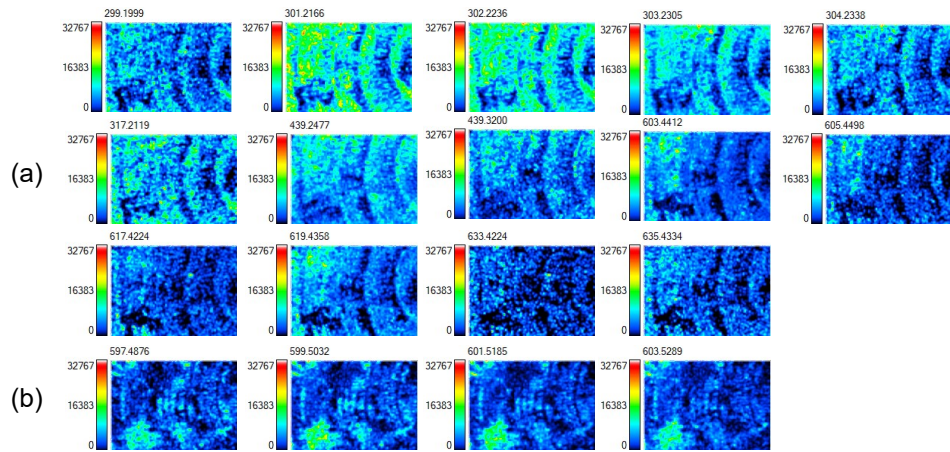

Fig. S8 Ion images of normal resin and traumatic resin in oil pine (the sample slice was taken from the same section as used in Fig. 4).
